# Supplementary material for: The crystal structure of the TolB box of colicin A in complex with TolB reveals important differences in the recruitment of the common TolB translocation portal used by group A colicins
Source: PubMed Central journal article supplement (PMC2821528; doi:10.1111/j.1365-2958.2009.06808.x), 2009-08-07
Supplement: mmi0075-0623-SD1.pdf [file mmi0075-0623-SD1.pdf]

## Supplementary Material

for

**The crystal structure of the TolB box of Colicin A in complex with TolB reveals important differences in the recruitment of the common TolB translocation portal used by group A colicins.**

Ying Zhang, Chan Li, Mireille N. Vankemmelbeke, Philip Bardelang, Max Paoli, Christopher N. Penfold and Richard James

### Supplementary Tables

**Table S1. Inter-molecular polar contacts in the TA<sub>1-107</sub>-TolB and TE9<sub>pep32-47</sub>-TolB complexes.**

| Angle (°) | Distance (Å) | TA <sub>1-107</sub>    | TolB                    | TE9                    | Distance (Å) | Angle (°) |
|-----------|--------------|------------------------|-------------------------|------------------------|--------------|-----------|
| 126       | 2.6          | Glu 18 O <sup>ε2</sup> | Ser 204 O <sup>γ</sup>  | Glu 42 O <sup>ε2</sup> | 2.5          | 124       |
| 131       | 3.0          | Glu 18 O <sup>ε1</sup> | His 245 N <sup>ε2</sup> | Glu 42 O <sup>ε1</sup> | 2.7          | 140       |
| 114       | 3.1          | Glu 18 O <sup>ε2</sup> | Ala 248 N               | Glu 42 O <sup>ε2</sup> | 2.8          | 109       |
| 134       | 2.9          | Ser 17 O <sup>γ</sup>  | Glu 292 O <sup>ε2</sup> | Ser 41 O <sup>γ</sup>  | 2.8          | 130       |
| 134       | 3.4          | Ser 17 N               | Glu 292 O <sup>ε2</sup> | Ser 41 N               | 2.8          | 147       |
| 119       | 2.8          | Trp 15 N <sup>ε1</sup> | Asp 307 O <sup>δ2</sup> | Trp 39 N <sup>ε1</sup> | 3.0          | 109       |
| -         | -            | -                      | Leu 202 O               | Trp 46 N <sup>ε1</sup> | 3.0          | 152       |

**Table S2. Inter-molecular non-polar contacts in the TA<sub>1-107</sub>-TolB and TE9<sub>pep32-47</sub>-TolB complexes.**

| TA <sub>1-107</sub>                                     | TolB                                   | TE9                                                     |
|---------------------------------------------------------|----------------------------------------|---------------------------------------------------------|
| Lys 9 C <sup>γ</sup>                                    | Phe 219 C <sup>δ2</sup>                | Ala 33 C <sup>β</sup>                                   |
|                                                         | Pro 201 C <sup>β</sup> -C <sup>γ</sup> | Ala 33 C <sup>β</sup>                                   |
| Asp 11 C <sup>β</sup>                                   | His 245 C <sup>δ2</sup>                | Asp 35 C <sup>β</sup>                                   |
| Thr 13 C <sup>γ2</sup>                                  | Leu 268 C <sup>δ1</sup>                | Ser 37 C <sup>β</sup>                                   |
| Trp 15 C <sup>γ</sup> -C <sup>δ2</sup> -C <sup>β3</sup> | Pro 312 C <sup>β</sup> -C <sup>γ</sup> | Trp 39 C <sup>γ</sup> -C <sup>δ2</sup> -C <sup>β3</sup> |
| Trp 15 C <sup>η2</sup> -C <sup>ζ2</sup>                 | Ser 306 C <sup>α</sup>                 | Trp 39 C <sup>η2</sup> -C <sup>ζ2</sup>                 |
| Trp 15 C <sup>η2</sup> -C <sup>ε3</sup>                 | Thr 305 C <sup>γ2</sup>                | Trp 39 C <sup>η2</sup> -C <sup>ε3</sup>                 |
| Trp 15 C <sup>ε3</sup>                                  | Thr 291 C <sup>γ2</sup>                | Trp 39 C <sup>ε3</sup>                                  |
| Ser 16 C <sup>β</sup>                                   | Thr 291 C <sup>γ2</sup>                | Ser 40 C <sup>β</sup>                                   |
| Glu 18 C <sup>γ</sup> -C <sup>α</sup>                   | Met 203 S <sup>δ</sup> -C <sup>ε</sup> | Glu 42 C <sup>γ</sup> -C <sup>α</sup>                   |
|                                                         | Met 203 C <sup>ε</sup>                 | Pro 45 C <sup>γ</sup>                                   |
|                                                         | Phe 423 C <sup>ζ</sup>                 | Pro 45 C <sup>γ</sup>                                   |
|                                                         | Gln 172 C <sup>β</sup>                 | Trp 46 C <sup>ζ3</sup>                                  |
|                                                         | Val 170 C <sup>γ1</sup>                | Trp 46 C <sup>η2</sup> -C <sup>ζ2</sup>                 |
|                                                         | Lys 422 C <sup>δ</sup>                 | Trp 46 C <sup>ζ2</sup>                                  |
|                                                         | Pro 201 C <sup>β</sup>                 | Trp 46 C <sup>δ1</sup>                                  |

**Table S3. Water mediated interactions between TA<sub>1-107</sub> and TolB.**

| Distance (Å) | Angle (°) | TolB                   | Water    | ColA                  | Distance (Å) | Angle (°) |
|--------------|-----------|------------------------|----------|-----------------------|--------------|-----------|
| 2.8          | 114       | His245 N <sup>δ1</sup> | HOH 37 O | Gly10 O               | 2.6          | 148       |
| 2.8          | 110       | Thr291 O <sup>γ1</sup> | HOH 33 O | Glu18 O <sup>E1</sup> | 3.0          | 144       |
|              |           |                        | HOH 33 O | Asp11 O <sup>δ2</sup> | 2.6          | 127       |
| 2.9          | 121       | Ser204 O <sup>γ</sup>  | HOH 59 O | Ser17 O <sup>γ</sup>  | 2.8          | 126       |

**Table S4. The buried surface areas between TolB and three binding ligands.**

|                                 | TolB-ColA  | TolB-Pal   | TolB-Cole9 peptide |
|---------------------------------|------------|------------|--------------------|
| TolB buried (Å) <sup>2</sup>    | 531        | 1142       | 598                |
| Partner buried (Å) <sup>2</sup> | 667 (ColA) | 1255 (Pal) | 824 (peptide)      |
| Complex buried (Å) <sup>2</sup> | 1198       | 2397       | 1422               |

**Table S5. Intra-molecular polar contacts for TA<sub>1-107</sub> and TE9<sub>pep32-47</sub> in their complexes with TolB.**

| TA <sub>1-107</sub>   | TolB                   |           | TE9 <sub>pep32-47</sub> |                        |                        |     |     |
|-----------------------|------------------------|-----------|-------------------------|------------------------|------------------------|-----|-----|
|                       | Distance (Å)           | Angle (°) | Distance (Å)            | Angle (°)              |                        |     |     |
|                       |                        |           | Gly 32 N                | Asn 44 O <sup>δ1</sup> |                        |     |     |
| Asp11 N               | Glu 18 O               | 2.9       | 151                     | Asp 35 N               | Glu 42 O               | 2.9 | 138 |
| Asp11 O <sup>δ1</sup> | Thr 13 O <sup>γ1</sup> | 2.8       | 120                     | Asp 35 O <sup>δ1</sup> | Ser 37 O <sup>γ</sup>  | 2.6 | 115 |
| Asp11 O <sup>δ2</sup> | Ser 16 O <sup>γ</sup>  | 2.6       | 127                     | Asp 35 O <sup>δ2</sup> | Ser 40 O <sup>γ</sup>  | 2.5 | 110 |
| Thr 13 N              | Asp11 O <sup>δ1</sup>  | 3.1       | 141                     | Ser 37 N               | Asp 35 O <sup>δ1</sup> | 3.0 | 126 |
| Ser 16 N              | Thr 13 O <sup>γ1</sup> | 3.1       | 131                     | Ser 40 N               | Ser 37 O <sup>γ</sup>  | 3.0 | 131 |
| Ser 16 O <sup>γ</sup> | Glu 18 N               | 3.2       | 117                     | Ser 40 O <sup>γ</sup>  | Glu 42 N               | 3.0 | 118 |
| Gly 12 N              | Asp11 O <sup>δ1</sup>  | 3.0       | 113                     | Gly36 N                | Asp35 O <sup>δ1</sup>  | 3.1 | 110 |
| Ser 16 O              | Arg 19 N <sup>e</sup>  | 3.2       | 171                     | Ser 40 O               | Asn 43 N               | 3.1 | 114 |
|                       |                        |           |                         | Gly 36 N               | Ser 34 O <sup>γ</sup>  | 3.0 | 128 |
|                       |                        |           |                         | Ser 37 O <sup>γ</sup>  | Ser 40 O <sup>γ</sup>  | 3.1 | 131 |
|                       |                        |           |                         | Gly 38 N               | Asn 43 O <sup>δ1</sup> | 2.8 | 106 |

## Supplementary Figure S1

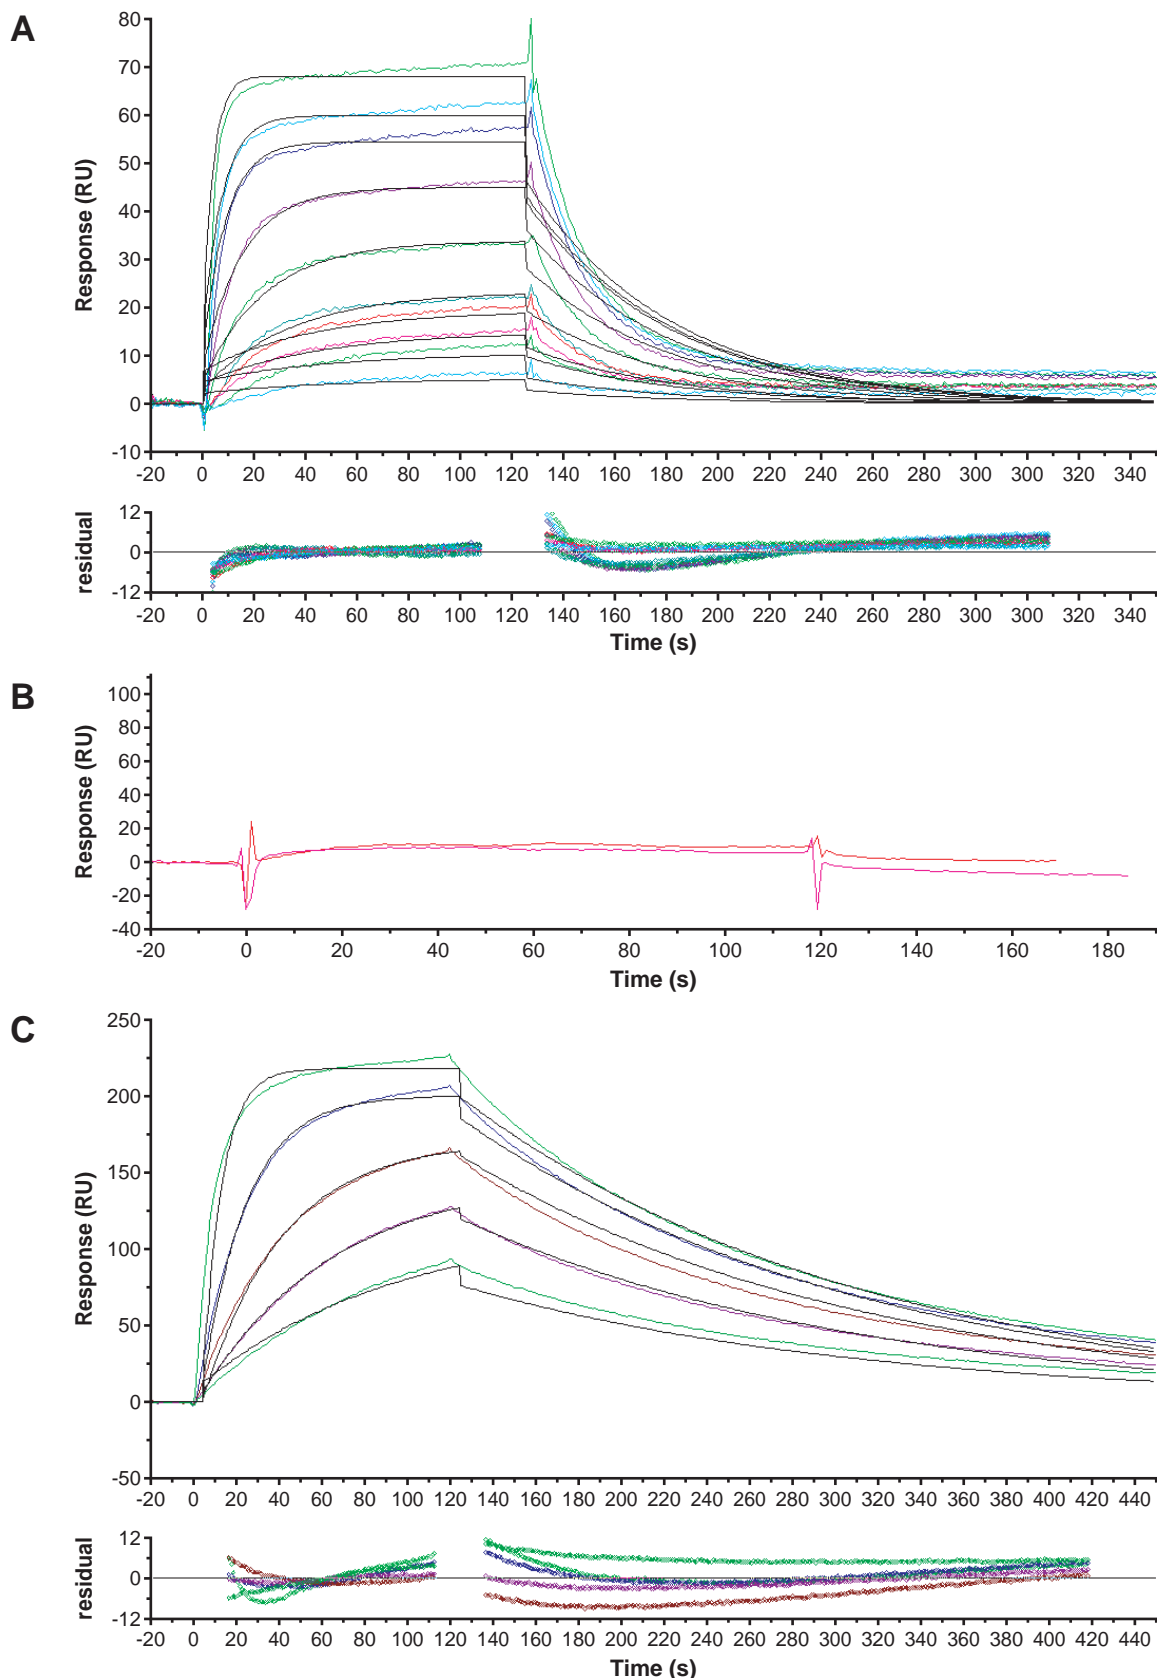

**Fig. S1. TolB interaction with ColA determined by SPR.** Corrected sensorgrams and residual plots of 0.1 μM, 0.2 μM, 0.4 μM, 0.5 μM, 1 μM, 2 μM, 5 μM, 8 μM, 10 μM, 20 μM TA<sub>1-107</sub> (A); 10 μM, 20 μM ColA E18A (B); 50 nM, 100 nM, 200 nM, 400 nM, 800 nM YZ67 (C) against TolB at 25°C with 1 mM Ca<sup>2+</sup> are shown. The fitted kinetic data for binding are superimposed onto each sensorgram trace in panels A & C. The residual plots are shown underneath and highlight deviation of the experimental data from the theoretical fit. An interaction between TolB and ColA E18A shown in panel B cannot be detected, and no kinetic data or residual plots are therefore presented. The experimental data in panel A shows systematic deviation from the theoretical 1:1 Langmuir binding model throughout the dissociation phase. Therefore, in addition to global fitting, the equilibrium dissociation constant K<sub>d</sub> for the interaction of TA<sub>1-107</sub> with TolB (A) was obtained using steady state affinity data (Biacore evaluation 3.1) which yielded a K<sub>d</sub> value of 2.3 μM, similar to that reported in Table 2 using the global fitting.

## Supplementary Figure S2

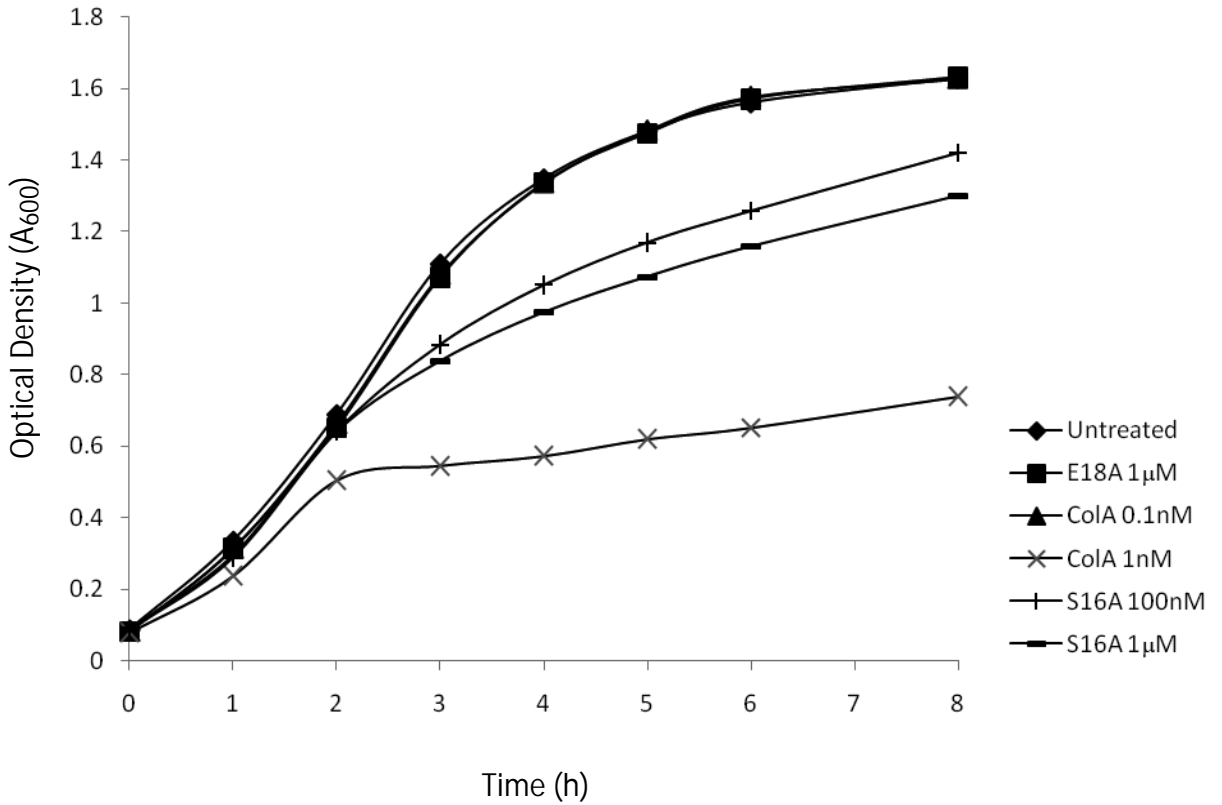

**Fig. S2. ColA has >1000 fold greater biological activity than ColA S16A mutant.** The amount of cell killing of *E. coli* DH5 $\alpha$  in liquid culture following treatment with 1  $\mu$ M of ColA S16A is less than 1 nM ColA. An untreated control and the inactive mutant ColA E18A were included as negative controls for cell killing. The data is a representative set of two independent experiments.

## Supplementary Figure S3

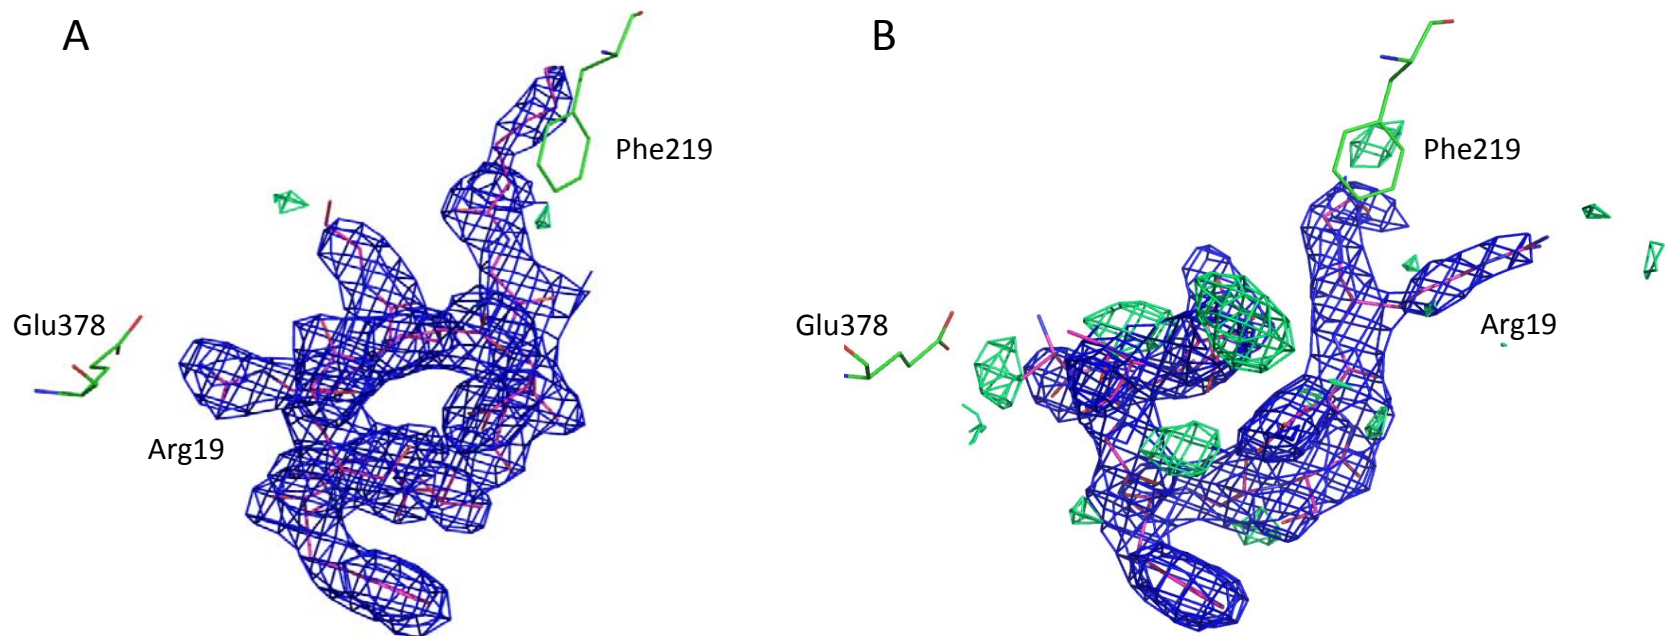

**Fig. S3. Electron density map of the orientation of the TolB box of colicin A relative to TolB.** 2Fo-Fc map contoured at  $0.95\sigma$  is shown in blue; Fo-Fc map contoured at  $3.0\sigma$  is shown in green. Two residues Phe219 and Glu378 from TolB and one residue Arg19 from the TolB box are chosen as references. (A) shows the correct orientation of the TolB box with no unregistered extra density; (B) shows the incorrect orientation of the TolB box containing some unregistered extra density shown in green.

The TolB box of colicin A was built by fitting Trp15 into the big electron density pump of the extra density. The peptide was extended until the end of the extra density according to the sequence of the TolB box. Then the Refmac5 was run and the output map was checked in Coot that gave some extra electron density (B). We then changed the orientation of the peptide with Trp15 as the axis and the positive electron density matched with the residues of the TolB box, which gave no extra electron density (A).

## Supplementary Figure S4

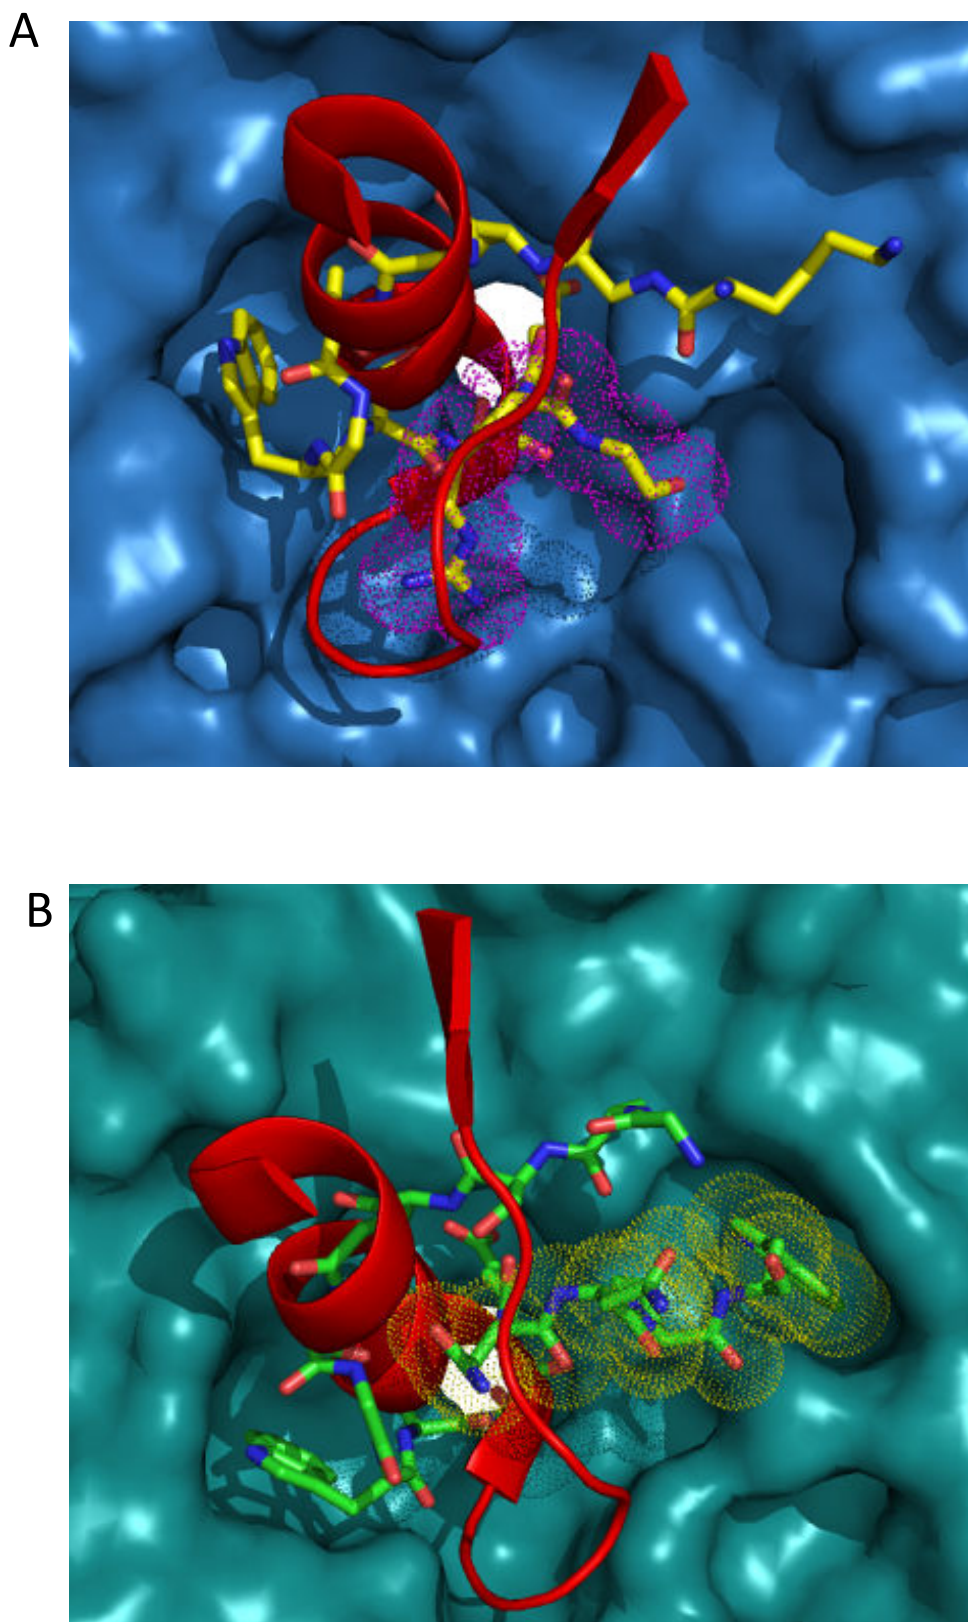

**Fig. S4. Comparison of the TolB boxes of ColA and ColE9 in contact with TolB.** Ball and stick representation of the TolB box residues of ColA (A) and ColE9 (B) in contact with TolB highlighting differences in the spatial distribution of distal residues of ColA (pink) and ColE9 (yellow) across the binding groove of TolB that influence competitive recruitment of TolB from Pal (red) by ColE9 but not ColA.

## Supplementary Figure S5

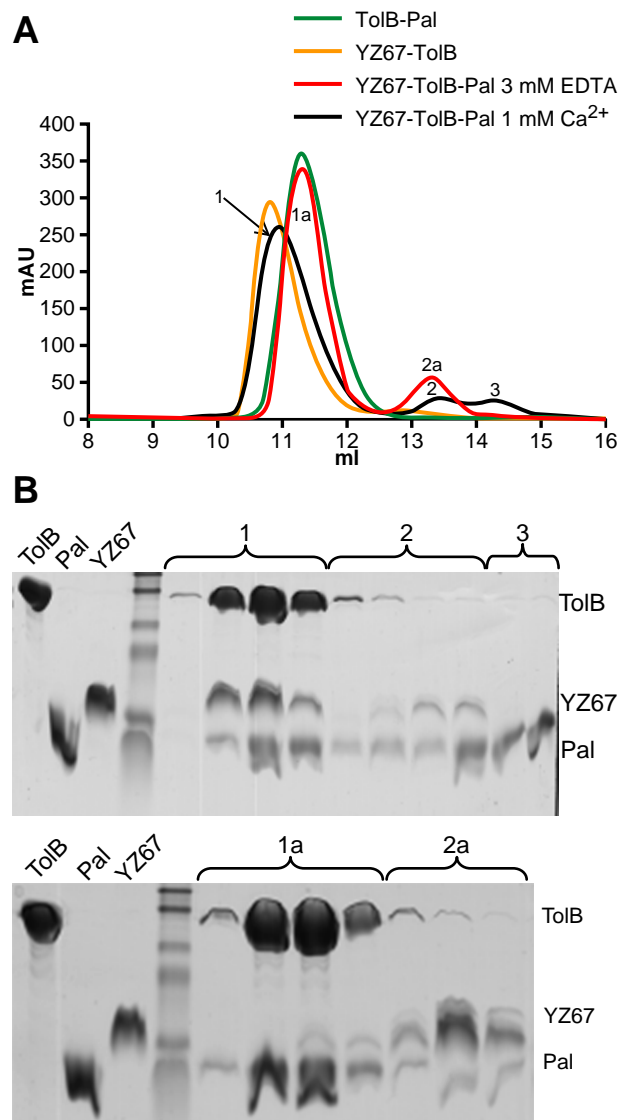

**Fig. S5. ColA containing the complete TolB box of ColE9 competitively recruits TolB from Pal.** (A) Gel filtration of a mixture of TolB and Pal, co-incubated stoichiometrically with YZ67 in the presence and absence of Ca<sup>2+</sup> ions. In the presence of Ca<sup>2+</sup> ions, three gel filtration peaks are observed (1-3) compared with only two in the absence of Ca<sup>2+</sup> ions (1a, 2a). (B) Gel filtration fractions were collected across peaks 1-3 (top gel) and 1a-2a (bottom gel) and run on 16% SDS-PAGE. The appearance of YZ67 in peak 1 but not peak 1a indicates that YZ67 competitively recruits TolB from the TolB-Pal complex in the presence of Ca<sup>2+</sup>.
